# Supplementary material
Source: PubMed Central journal article supplement (PMC4156916)

## Supplementary Analysis: Descriptive Statistics by Trial Type

|                                       | All Trials     |       | Treatment Trials |       | Control and Prevention Trials |       |
|---------------------------------------|----------------|-------|------------------|-------|-------------------------------|-------|
|                                       | Mean           | Range | Mean             | Range | Mean                          | Range |
| <b>Outcome</b>                        |                |       |                  |       |                               |       |
| 2011 Patient Enrollment<br>(n=485)    | 4.7<br>(8.1)   | 0, 62 | 2.0<br>(3.7)     | 0, 36 | 2.7<br>(5.5)                  | 0, 50 |
| <b>Descriptive Variables</b>          |                |       |                  |       |                               |       |
| <b>Gender</b>                         |                |       |                  |       |                               |       |
| Male<br>(n=357)                       | 4.7<br>(8.3)   | 0, 62 | 2.1<br>(3.8)     | 0, 36 | 2.6<br>(5.5)                  | 0, 50 |
| Female<br>(n=128)                     | 4.6<br>(7.5)   | 0, 43 | 1.9<br>(3.2)     | 0, 14 | 2.8<br>(5.6)                  | 0, 41 |
| <b>Race</b>                           |                |       |                  |       |                               |       |
| White<br>(n=374)                      | 4.9<br>(8.6)   | 0, 62 | 2.1<br>(3.9)     | 0, 36 | 2.8<br>(5.9)                  | 0, 50 |
| Asian<br>(n=72)                       | 4.1<br>(6.8)   | 0, 33 | 1.8<br>(2.9)     | 0, 12 | 2.3<br>(4.5)                  | 0, 26 |
| African American<br>(n=6)             | 3.5<br>(5.0)   | 0, 12 | 1.5<br>(2.1)     | 0, 5  | 2.0<br>(3.5)                  | 0, 9  |
| Other<br>(n=33)                       | 3.4<br>(5.6)   | 0, 23 | 1.6<br>(2.6)     | 0, 9  | 1.7<br>(3.5)                  | 0, 17 |
| <b>Personal Characteristics</b>       |                |       |                  |       |                               |       |
| <b>Practice Type</b>                  |                |       |                  |       |                               |       |
| Group Practice<br>(n=411)             | 5.0<br>(8.4)   | 0, 62 | 2.1<br>(3.8)     | 0, 36 | 2.8<br>(5.7)                  | 0, 50 |
| Hospital Based<br>(n=56)              | 2.9<br>(5.5)   | 0, 34 | 1.4<br>(2.2)     | 0, 12 | 1.6<br>(4.2)                  | 0, 30 |
| Solo Practice<br>(n=18)               | 3.7<br>(7.8)   | 0, 32 | 1.5<br>(3.1)     | 0, 12 | 2.2<br>(6.1)                  | 0, 26 |
| <b>Training Location</b>              |                |       |                  |       |                               |       |
| U.S. Trained<br>(n=332)               | 4.2<br>(7.2)   | 0, 53 | 1.9<br>(3.8)     | 0, 36 | 2.3<br>(4.4)                  | 0, 30 |
| Non U.S. Trained<br>(n=153)           | 5.7<br>(9.7)   | 0, 62 | 2.2<br>(3.4)     | 0, 13 | 3.5<br>(7.3)                  | 0, 50 |
| <b>Medical Specialty</b>              |                |       |                  |       |                               |       |
| Hematology Oncology<br>(n=196)        | 5.7<br>(8.2)   | 0, 62 | 2.7<br>(3.4)     | 0, 14 | 3.1<br>(5.6)                  | 0, 50 |
| Radiation Oncology<br>(n=100)         | 2.8<br>(6.8)   | 0, 43 | 0.5<br>(1.4)     | 0, 9  | 2.3<br>(6.0)                  | 0, 41 |
| Non Oncology Specialty<br>(n=87)      | 3.4<br>(5.5)   | 0, 24 | 1.9<br>(3.4)     | 0, 23 | 1.5<br>(3.1)                  | 0, 15 |
| Medical Oncology<br>(n=53)            | 7.7<br>(10.7)  | 0, 53 | 3.4<br>(4.7)     | 0, 23 | 4.4<br>(6.9)                  | 0, 30 |
| Surgery<br>(n=49)                     | 3.3<br>(9.3)   | 0, 45 | 1.4<br>(5.6)     | 0, 36 | 1.6<br>(5.3)                  | 0, 26 |
| <b>CCOP Principal Investigator</b>    |                |       |                  |       |                               |       |
| Principal Investigator<br>(n=42)      | 14.3<br>(14.7) | 0, 62 | 6.1<br>(7.4)     | 0, 36 | 8.2<br>(10.0)                 | 0, 50 |
| Non Principal Investigator<br>(n=443) | 3.8<br>(6.5)   | 0, 43 | 1.6<br>(2.8)     | 0, 14 | 2.1<br>(4.6)                  | 0, 41 |

Standard deviations in parentheses

*Other race* includes American Indian, Native Hawaiian/Pacific Islander, more than one race, or unknown

*Hematology oncology* includes blood banking, hematology oncology, hematology

*Radiation oncology* includes diagnostic radiology, nuclear medicine, radiation oncology, radiology, vascular and interventional

*Non oncology specialist* includes general practice, gynecological oncology, pediatrics, pediatric hematology, etc.

*Surgery* includes colon and rectal surgery, critical care surgery, general surgery, neurological surgery, surgical oncology, etc.

Organizational and Physician Factors Associated with Patient Enrollment in Cancer Clinical Trials

|                                                                                                                                                                                   |                                                                                                                                                                                                                                                                                                                                                                                                                                                                                                                                                                                                                                                                                                                                                                                                                                                                                                                                                                                                                                                                                                                                                                                                                                                                                                                                                                                                                                                                                                                                                                                                                                                                                                                                                                                                                                                                                                                                                                                                                                                                                                                                                                                                                                                                                                                                                                                                                                                                                                                                                                                                                                                                                                                                                                                                                                                                                                                                                                                                                                                                                                                                                                                                                                                                                                                                                                                                                                                                                                                                                                                                                                                                                                                                                                          |                                                                                                                                                                                   |                                                                                                                                                                                                                                                                                                                                                                   |                                                                                                                                                                                 |                                                                                                                                                                                                                                                                        |                                                                                                                                                                                |                                                                                                                                                                                                                                                                                                                                                                                                                                                          |                                                                                                                                                                                   |                                                                                                                                                                                                                                                                                                                                                                                                                                                           |                                                                                                                                                                               |                                                                                                                                                                                                                               |                                                                                                                                                                                  |                                                                                                                                                                                                                               |
|-----------------------------------------------------------------------------------------------------------------------------------------------------------------------------------|--------------------------------------------------------------------------------------------------------------------------------------------------------------------------------------------------------------------------------------------------------------------------------------------------------------------------------------------------------------------------------------------------------------------------------------------------------------------------------------------------------------------------------------------------------------------------------------------------------------------------------------------------------------------------------------------------------------------------------------------------------------------------------------------------------------------------------------------------------------------------------------------------------------------------------------------------------------------------------------------------------------------------------------------------------------------------------------------------------------------------------------------------------------------------------------------------------------------------------------------------------------------------------------------------------------------------------------------------------------------------------------------------------------------------------------------------------------------------------------------------------------------------------------------------------------------------------------------------------------------------------------------------------------------------------------------------------------------------------------------------------------------------------------------------------------------------------------------------------------------------------------------------------------------------------------------------------------------------------------------------------------------------------------------------------------------------------------------------------------------------------------------------------------------------------------------------------------------------------------------------------------------------------------------------------------------------------------------------------------------------------------------------------------------------------------------------------------------------------------------------------------------------------------------------------------------------------------------------------------------------------------------------------------------------------------------------------------------------------------------------------------------------------------------------------------------------------------------------------------------------------------------------------------------------------------------------------------------------------------------------------------------------------------------------------------------------------------------------------------------------------------------------------------------------------------------------------------------------------------------------------------------------------------------------------------------------------------------------------------------------------------------------------------------------------------------------------------------------------------------------------------------------------------------------------------------------------------------------------------------------------------------------------------------------------------------------------------------------------------------------------------------------|-----------------------------------------------------------------------------------------------------------------------------------------------------------------------------------|-------------------------------------------------------------------------------------------------------------------------------------------------------------------------------------------------------------------------------------------------------------------------------------------------------------------------------------------------------------------|---------------------------------------------------------------------------------------------------------------------------------------------------------------------------------|------------------------------------------------------------------------------------------------------------------------------------------------------------------------------------------------------------------------------------------------------------------------|--------------------------------------------------------------------------------------------------------------------------------------------------------------------------------|----------------------------------------------------------------------------------------------------------------------------------------------------------------------------------------------------------------------------------------------------------------------------------------------------------------------------------------------------------------------------------------------------------------------------------------------------------|-----------------------------------------------------------------------------------------------------------------------------------------------------------------------------------|-----------------------------------------------------------------------------------------------------------------------------------------------------------------------------------------------------------------------------------------------------------------------------------------------------------------------------------------------------------------------------------------------------------------------------------------------------------|-------------------------------------------------------------------------------------------------------------------------------------------------------------------------------|-------------------------------------------------------------------------------------------------------------------------------------------------------------------------------------------------------------------------------|----------------------------------------------------------------------------------------------------------------------------------------------------------------------------------|-------------------------------------------------------------------------------------------------------------------------------------------------------------------------------------------------------------------------------|
| Manuscript ID:                                                                                                                                                                    | CT-13-0268.R2                                                                                                                                                                                                                                                                                                                                                                                                                                                                                                                                                                                                                                                                                                                                                                                                                                                                                                                                                                                                                                                                                                                                                                                                                                                                                                                                                                                                                                                                                                                                                                                                                                                                                                                                                                                                                                                                                                                                                                                                                                                                                                                                                                                                                                                                                                                                                                                                                                                                                                                                                                                                                                                                                                                                                                                                                                                                                                                                                                                                                                                                                                                                                                                                                                                                                                                                                                                                                                                                                                                                                                                                                                                                                                                                                            |                                                                                                                                                                                   |                                                                                                                                                                                                                                                                                                                                                                   |                                                                                                                                                                                 |                                                                                                                                                                                                                                                                        |                                                                                                                                                                                |                                                                                                                                                                                                                                                                                                                                                                                                                                                          |                                                                                                                                                                                   |                                                                                                                                                                                                                                                                                                                                                                                                                                                           |                                                                                                                                                                               |                                                                                                                                                                                                                               |                                                                                                                                                                                  |                                                                                                                                                                                                                               |
| Funding Institution:                                                                                                                                                              | National Cancer Institute, R25CA116339                                                                                                                                                                                                                                                                                                                                                                                                                                                                                                                                                                                                                                                                                                                                                                                                                                                                                                                                                                                                                                                                                                                                                                                                                                                                                                                                                                                                                                                                                                                                                                                                                                                                                                                                                                                                                                                                                                                                                                                                                                                                                                                                                                                                                                                                                                                                                                                                                                                                                                                                                                                                                                                                                                                                                                                                                                                                                                                                                                                                                                                                                                                                                                                                                                                                                                                                                                                                                                                                                                                                                                                                                                                                                                                                   |                                                                                                                                                                                   |                                                                                                                                                                                                                                                                                                                                                                   |                                                                                                                                                                                 |                                                                                                                                                                                                                                                                        |                                                                                                                                                                                |                                                                                                                                                                                                                                                                                                                                                                                                                                                          |                                                                                                                                                                                   |                                                                                                                                                                                                                                                                                                                                                                                                                                                           |                                                                                                                                                                               |                                                                                                                                                                                                                               |                                                                                                                                                                                  |                                                                                                                                                                                                                               |
| Funding Institution:                                                                                                                                                              | National Cancer Institute, R01CA124402                                                                                                                                                                                                                                                                                                                                                                                                                                                                                                                                                                                                                                                                                                                                                                                                                                                                                                                                                                                                                                                                                                                                                                                                                                                                                                                                                                                                                                                                                                                                                                                                                                                                                                                                                                                                                                                                                                                                                                                                                                                                                                                                                                                                                                                                                                                                                                                                                                                                                                                                                                                                                                                                                                                                                                                                                                                                                                                                                                                                                                                                                                                                                                                                                                                                                                                                                                                                                                                                                                                                                                                                                                                                                                                                   |                                                                                                                                                                                   |                                                                                                                                                                                                                                                                                                                                                                   |                                                                                                                                                                                 |                                                                                                                                                                                                                                                                        |                                                                                                                                                                                |                                                                                                                                                                                                                                                                                                                                                                                                                                                          |                                                                                                                                                                                   |                                                                                                                                                                                                                                                                                                                                                                                                                                                           |                                                                                                                                                                               |                                                                                                                                                                                                                               |                                                                                                                                                                                  |                                                                                                                                                                                                                               |
| Funding Institution:                                                                                                                                                              | U.S. Department of Veterans Affairs, RCS 91-408                                                                                                                                                                                                                                                                                                                                                                                                                                                                                                                                                                                                                                                                                                                                                                                                                                                                                                                                                                                                                                                                                                                                                                                                                                                                                                                                                                                                                                                                                                                                                                                                                                                                                                                                                                                                                                                                                                                                                                                                                                                                                                                                                                                                                                                                                                                                                                                                                                                                                                                                                                                                                                                                                                                                                                                                                                                                                                                                                                                                                                                                                                                                                                                                                                                                                                                                                                                                                                                                                                                                                                                                                                                                                                                          |                                                                                                                                                                                   |                                                                                                                                                                                                                                                                                                                                                                   |                                                                                                                                                                                 |                                                                                                                                                                                                                                                                        |                                                                                                                                                                                |                                                                                                                                                                                                                                                                                                                                                                                                                                                          |                                                                                                                                                                                   |                                                                                                                                                                                                                                                                                                                                                                                                                                                           |                                                                                                                                                                               |                                                                                                                                                                                                                               |                                                                                                                                                                                  |                                                                                                                                                                                                                               |
|                                                                                                                                                                                   | <div style="border: 1px solid black; padding: 2px; display: inline-block;"> <span>Jacobs, Sara Rubin</span> </div> <input checked="" type="checkbox"/> Save <input type="checkbox"/> <a href="#">Jacobs, Sara Rubin</a> (proxy)                                                                                                                                                                                                                                                                                                                                                                                                                                                                                                                                                                                                                                                                                                                                                                                                                                                                                                                                                                                                                                                                                                                                                                                                                                                                                                                                                                                                                                                                                                                                                                                                                                                                                                                                                                                                                                                                                                                                                                                                                                                                                                                                                                                                                                                                                                                                                                                                                                                                                                                                                                                                                                                                                                                                                                                                                                                                                                                                                                                                                                                                                                                                                                                                                                                                                                                                                                                                                                                                                                                                          |                                                                                                                                                                                   |                                                                                                                                                                                                                                                                                                                                                                   |                                                                                                                                                                                 |                                                                                                                                                                                                                                                                        |                                                                                                                                                                                |                                                                                                                                                                                                                                                                                                                                                                                                                                                          |                                                                                                                                                                                   |                                                                                                                                                                                                                                                                                                                                                                                                                                                           |                                                                                                                                                                               |                                                                                                                                                                                                                               |                                                                                                                                                                                  |                                                                                                                                                                                                                               |
| Submitting Author:                                                                                                                                                                | <ul style="list-style-type: none"> <li> <span style="font-size: 0.8em;">•</span> <i>primary affiliation</i><br/>           University of North Carolina at Chapel Hill - Department of Health Policy and Management<br/>           Gillings School of Global Public Health 1101 McGavran-Greenberg Hall, CB #7411 Chapel Hill North Carolina 27599-7411<br/>           United States<br/>           T: 513-543-2637         </li> </ul>                                                                                                                                                                                                                                                                                                                                                                                                                                                                                                                                                                                                                                                                                                                                                                                                                                                                                                                                                                                                                                                                                                                                                                                                                                                                                                                                                                                                                                                                                                                                                                                                                                                                                                                                                                                                                                                                                                                                                                                                                                                                                                                                                                                                                                                                                                                                                                                                                                                                                                                                                                                                                                                                                                                                                                                                                                                                                                                                                                                                                                                                                                                                                                                                                                                                                                                                  |                                                                                                                                                                                   |                                                                                                                                                                                                                                                                                                                                                                   |                                                                                                                                                                                 |                                                                                                                                                                                                                                                                        |                                                                                                                                                                                |                                                                                                                                                                                                                                                                                                                                                                                                                                                          |                                                                                                                                                                                   |                                                                                                                                                                                                                                                                                                                                                                                                                                                           |                                                                                                                                                                               |                                                                                                                                                                                                                               |                                                                                                                                                                                  |                                                                                                                                                                                                                               |
| Authors & Institutions:                                                                                                                                                           | <table style="width: 100%; border-collapse: collapse;"> <tr> <td style="width: 30%; vertical-align: top;"> <ul style="list-style-type: none"> <li> <span style="font-size: 0.8em;">•</span> <a href="#">Jacobs, Sara Rubin</a><br/> <span style="font-size: 0.8em;">proxy</span> </li> </ul> </td> <td style="vertical-align: top;"> <ul style="list-style-type: none"> <li> <span style="font-size: 0.8em;">•</span> University of North Carolina at Chapel Hill - Department of Health Policy and Management<br/>           Gillings School of Global Public Health 1101 McGavran-Greenberg Hall, CB #7411 , Chapel Hill, North Carolina 27599-7411<br/>           United States         </li> </ul> </td> </tr> <tr> <td style="vertical-align: top;"> <ul style="list-style-type: none"> <li> <span style="font-size: 0.8em;">•</span> <a href="#">Weiner, Bryan J.</a><br/> <span style="font-size: 0.8em;">proxy</span> </li> </ul> </td> <td style="vertical-align: top;"> <ul style="list-style-type: none"> <li> <span style="font-size: 0.8em;">•</span> University of North Carolina at Chapel Hill - Department of Health Policy and Management<br/>           Chapel Hill , North Carolina<br/>           United States         </li> </ul> </td> </tr> <tr> <td style="vertical-align: top;"> <ul style="list-style-type: none"> <li> <span style="font-size: 0.8em;">•</span> <a href="#">Reeve, Bryce B.</a><br/> <span style="font-size: 0.8em;">proxy</span> </li> </ul> </td> <td style="vertical-align: top;"> <ul style="list-style-type: none"> <li> <span style="font-size: 0.8em;">•</span> University of North Carolina at Chapel Hill - Lineberger Comprehensive Cancer Center<br/>           Chapel Hill , North Carolina<br/>           United States<br/><br/>           University of North Carolina at Chapel Hill - Department of Health Policy and Management<br/>           Chapel Hill , North Carolina<br/>           United States         </li> </ul> </td> </tr> <tr> <td style="vertical-align: top;"> <ul style="list-style-type: none"> <li> <span style="font-size: 0.8em;">•</span> <a href="#">Weinberger, Morris</a><br/> <span style="font-size: 0.8em;">proxy</span> </li> </ul> </td> <td style="vertical-align: top;"> <ul style="list-style-type: none"> <li> <span style="font-size: 0.8em;">•</span> University of North Carolina at Chapel Hill - Department of Health Policy and Management<br/>           Chapel Hill , North Carolina<br/>           United States<br/><br/>           Durham Department of Veterans Affairs - Center for Health Services Research in Primary Care<br/>           Durham, North Carolina<br/>           United States         </li> </ul> </td> </tr> <tr> <td style="vertical-align: top;"> <ul style="list-style-type: none"> <li> <span style="font-size: 0.8em;">•</span> <a href="#">Minasian, Lori</a><br/> <span style="font-size: 0.8em;">proxy</span> </li> </ul> </td> <td style="vertical-align: top;"> <ul style="list-style-type: none"> <li> <span style="font-size: 0.8em;">•</span> National Cancer Institute - Division of Cancer Prevention<br/>           Bethesda, Maryland<br/>           United States         </li> </ul> </td> </tr> <tr> <td style="vertical-align: top;"> <ul style="list-style-type: none"> <li> <span style="font-size: 0.8em;">•</span> <a href="#">Good, Marjorie J.</a><br/> <span style="font-size: 0.8em;">proxy</span> </li> </ul> </td> <td style="vertical-align: top;"> <ul style="list-style-type: none"> <li> <span style="font-size: 0.8em;">•</span> National Cancer Institute - Division of Cancer Prevention<br/>           Bethesda, Maryland<br/>           United States         </li> </ul> </td> </tr> </table> | <ul style="list-style-type: none"> <li> <span style="font-size: 0.8em;">•</span> <a href="#">Jacobs, Sara Rubin</a><br/> <span style="font-size: 0.8em;">proxy</span> </li> </ul> | <ul style="list-style-type: none"> <li> <span style="font-size: 0.8em;">•</span> University of North Carolina at Chapel Hill - Department of Health Policy and Management<br/>           Gillings School of Global Public Health 1101 McGavran-Greenberg Hall, CB #7411 , Chapel Hill, North Carolina 27599-7411<br/>           United States         </li> </ul> | <ul style="list-style-type: none"> <li> <span style="font-size: 0.8em;">•</span> <a href="#">Weiner, Bryan J.</a><br/> <span style="font-size: 0.8em;">proxy</span> </li> </ul> | <ul style="list-style-type: none"> <li> <span style="font-size: 0.8em;">•</span> University of North Carolina at Chapel Hill - Department of Health Policy and Management<br/>           Chapel Hill , North Carolina<br/>           United States         </li> </ul> | <ul style="list-style-type: none"> <li> <span style="font-size: 0.8em;">•</span> <a href="#">Reeve, Bryce B.</a><br/> <span style="font-size: 0.8em;">proxy</span> </li> </ul> | <ul style="list-style-type: none"> <li> <span style="font-size: 0.8em;">•</span> University of North Carolina at Chapel Hill - Lineberger Comprehensive Cancer Center<br/>           Chapel Hill , North Carolina<br/>           United States<br/><br/>           University of North Carolina at Chapel Hill - Department of Health Policy and Management<br/>           Chapel Hill , North Carolina<br/>           United States         </li> </ul> | <ul style="list-style-type: none"> <li> <span style="font-size: 0.8em;">•</span> <a href="#">Weinberger, Morris</a><br/> <span style="font-size: 0.8em;">proxy</span> </li> </ul> | <ul style="list-style-type: none"> <li> <span style="font-size: 0.8em;">•</span> University of North Carolina at Chapel Hill - Department of Health Policy and Management<br/>           Chapel Hill , North Carolina<br/>           United States<br/><br/>           Durham Department of Veterans Affairs - Center for Health Services Research in Primary Care<br/>           Durham, North Carolina<br/>           United States         </li> </ul> | <ul style="list-style-type: none"> <li> <span style="font-size: 0.8em;">•</span> <a href="#">Minasian, Lori</a><br/> <span style="font-size: 0.8em;">proxy</span> </li> </ul> | <ul style="list-style-type: none"> <li> <span style="font-size: 0.8em;">•</span> National Cancer Institute - Division of Cancer Prevention<br/>           Bethesda, Maryland<br/>           United States         </li> </ul> | <ul style="list-style-type: none"> <li> <span style="font-size: 0.8em;">•</span> <a href="#">Good, Marjorie J.</a><br/> <span style="font-size: 0.8em;">proxy</span> </li> </ul> | <ul style="list-style-type: none"> <li> <span style="font-size: 0.8em;">•</span> National Cancer Institute - Division of Cancer Prevention<br/>           Bethesda, Maryland<br/>           United States         </li> </ul> |
| <ul style="list-style-type: none"> <li> <span style="font-size: 0.8em;">•</span> <a href="#">Jacobs, Sara Rubin</a><br/> <span style="font-size: 0.8em;">proxy</span> </li> </ul> | <ul style="list-style-type: none"> <li> <span style="font-size: 0.8em;">•</span> University of North Carolina at Chapel Hill - Department of Health Policy and Management<br/>           Gillings School of Global Public Health 1101 McGavran-Greenberg Hall, CB #7411 , Chapel Hill, North Carolina 27599-7411<br/>           United States         </li> </ul>                                                                                                                                                                                                                                                                                                                                                                                                                                                                                                                                                                                                                                                                                                                                                                                                                                                                                                                                                                                                                                                                                                                                                                                                                                                                                                                                                                                                                                                                                                                                                                                                                                                                                                                                                                                                                                                                                                                                                                                                                                                                                                                                                                                                                                                                                                                                                                                                                                                                                                                                                                                                                                                                                                                                                                                                                                                                                                                                                                                                                                                                                                                                                                                                                                                                                                                                                                                                        |                                                                                                                                                                                   |                                                                                                                                                                                                                                                                                                                                                                   |                                                                                                                                                                                 |                                                                                                                                                                                                                                                                        |                                                                                                                                                                                |                                                                                                                                                                                                                                                                                                                                                                                                                                                          |                                                                                                                                                                                   |                                                                                                                                                                                                                                                                                                                                                                                                                                                           |                                                                                                                                                                               |                                                                                                                                                                                                                               |                                                                                                                                                                                  |                                                                                                                                                                                                                               |
| <ul style="list-style-type: none"> <li> <span style="font-size: 0.8em;">•</span> <a href="#">Weiner, Bryan J.</a><br/> <span style="font-size: 0.8em;">proxy</span> </li> </ul>   | <ul style="list-style-type: none"> <li> <span style="font-size: 0.8em;">•</span> University of North Carolina at Chapel Hill - Department of Health Policy and Management<br/>           Chapel Hill , North Carolina<br/>           United States         </li> </ul>                                                                                                                                                                                                                                                                                                                                                                                                                                                                                                                                                                                                                                                                                                                                                                                                                                                                                                                                                                                                                                                                                                                                                                                                                                                                                                                                                                                                                                                                                                                                                                                                                                                                                                                                                                                                                                                                                                                                                                                                                                                                                                                                                                                                                                                                                                                                                                                                                                                                                                                                                                                                                                                                                                                                                                                                                                                                                                                                                                                                                                                                                                                                                                                                                                                                                                                                                                                                                                                                                                   |                                                                                                                                                                                   |                                                                                                                                                                                                                                                                                                                                                                   |                                                                                                                                                                                 |                                                                                                                                                                                                                                                                        |                                                                                                                                                                                |                                                                                                                                                                                                                                                                                                                                                                                                                                                          |                                                                                                                                                                                   |                                                                                                                                                                                                                                                                                                                                                                                                                                                           |                                                                                                                                                                               |                                                                                                                                                                                                                               |                                                                                                                                                                                  |                                                                                                                                                                                                                               |
| <ul style="list-style-type: none"> <li> <span style="font-size: 0.8em;">•</span> <a href="#">Reeve, Bryce B.</a><br/> <span style="font-size: 0.8em;">proxy</span> </li> </ul>    | <ul style="list-style-type: none"> <li> <span style="font-size: 0.8em;">•</span> University of North Carolina at Chapel Hill - Lineberger Comprehensive Cancer Center<br/>           Chapel Hill , North Carolina<br/>           United States<br/><br/>           University of North Carolina at Chapel Hill - Department of Health Policy and Management<br/>           Chapel Hill , North Carolina<br/>           United States         </li> </ul>                                                                                                                                                                                                                                                                                                                                                                                                                                                                                                                                                                                                                                                                                                                                                                                                                                                                                                                                                                                                                                                                                                                                                                                                                                                                                                                                                                                                                                                                                                                                                                                                                                                                                                                                                                                                                                                                                                                                                                                                                                                                                                                                                                                                                                                                                                                                                                                                                                                                                                                                                                                                                                                                                                                                                                                                                                                                                                                                                                                                                                                                                                                                                                                                                                                                                                                 |                                                                                                                                                                                   |                                                                                                                                                                                                                                                                                                                                                                   |                                                                                                                                                                                 |                                                                                                                                                                                                                                                                        |                                                                                                                                                                                |                                                                                                                                                                                                                                                                                                                                                                                                                                                          |                                                                                                                                                                                   |                                                                                                                                                                                                                                                                                                                                                                                                                                                           |                                                                                                                                                                               |                                                                                                                                                                                                                               |                                                                                                                                                                                  |                                                                                                                                                                                                                               |
| <ul style="list-style-type: none"> <li> <span style="font-size: 0.8em;">•</span> <a href="#">Weinberger, Morris</a><br/> <span style="font-size: 0.8em;">proxy</span> </li> </ul> | <ul style="list-style-type: none"> <li> <span style="font-size: 0.8em;">•</span> University of North Carolina at Chapel Hill - Department of Health Policy and Management<br/>           Chapel Hill , North Carolina<br/>           United States<br/><br/>           Durham Department of Veterans Affairs - Center for Health Services Research in Primary Care<br/>           Durham, North Carolina<br/>           United States         </li> </ul>                                                                                                                                                                                                                                                                                                                                                                                                                                                                                                                                                                                                                                                                                                                                                                                                                                                                                                                                                                                                                                                                                                                                                                                                                                                                                                                                                                                                                                                                                                                                                                                                                                                                                                                                                                                                                                                                                                                                                                                                                                                                                                                                                                                                                                                                                                                                                                                                                                                                                                                                                                                                                                                                                                                                                                                                                                                                                                                                                                                                                                                                                                                                                                                                                                                                                                                |                                                                                                                                                                                   |                                                                                                                                                                                                                                                                                                                                                                   |                                                                                                                                                                                 |                                                                                                                                                                                                                                                                        |                                                                                                                                                                                |                                                                                                                                                                                                                                                                                                                                                                                                                                                          |                                                                                                                                                                                   |                                                                                                                                                                                                                                                                                                                                                                                                                                                           |                                                                                                                                                                               |                                                                                                                                                                                                                               |                                                                                                                                                                                  |                                                                                                                                                                                                                               |
| <ul style="list-style-type: none"> <li> <span style="font-size: 0.8em;">•</span> <a href="#">Minasian, Lori</a><br/> <span style="font-size: 0.8em;">proxy</span> </li> </ul>     | <ul style="list-style-type: none"> <li> <span style="font-size: 0.8em;">•</span> National Cancer Institute - Division of Cancer Prevention<br/>           Bethesda, Maryland<br/>           United States         </li> </ul>                                                                                                                                                                                                                                                                                                                                                                                                                                                                                                                                                                                                                                                                                                                                                                                                                                                                                                                                                                                                                                                                                                                                                                                                                                                                                                                                                                                                                                                                                                                                                                                                                                                                                                                                                                                                                                                                                                                                                                                                                                                                                                                                                                                                                                                                                                                                                                                                                                                                                                                                                                                                                                                                                                                                                                                                                                                                                                                                                                                                                                                                                                                                                                                                                                                                                                                                                                                                                                                                                                                                            |                                                                                                                                                                                   |                                                                                                                                                                                                                                                                                                                                                                   |                                                                                                                                                                                 |                                                                                                                                                                                                                                                                        |                                                                                                                                                                                |                                                                                                                                                                                                                                                                                                                                                                                                                                                          |                                                                                                                                                                                   |                                                                                                                                                                                                                                                                                                                                                                                                                                                           |                                                                                                                                                                               |                                                                                                                                                                                                                               |                                                                                                                                                                                  |                                                                                                                                                                                                                               |
| <ul style="list-style-type: none"> <li> <span style="font-size: 0.8em;">•</span> <a href="#">Good, Marjorie J.</a><br/> <span style="font-size: 0.8em;">proxy</span> </li> </ul>  | <ul style="list-style-type: none"> <li> <span style="font-size: 0.8em;">•</span> National Cancer Institute - Division of Cancer Prevention<br/>           Bethesda, Maryland<br/>           United States         </li> </ul>                                                                                                                                                                                                                                                                                                                                                                                                                                                                                                                                                                                                                                                                                                                                                                                                                                                                                                                                                                                                                                                                                                                                                                                                                                                                                                                                                                                                                                                                                                                                                                                                                                                                                                                                                                                                                                                                                                                                                                                                                                                                                                                                                                                                                                                                                                                                                                                                                                                                                                                                                                                                                                                                                                                                                                                                                                                                                                                                                                                                                                                                                                                                                                                                                                                                                                                                                                                                                                                                                                                                            |                                                                                                                                                                                   |                                                                                                                                                                                                                                                                                                                                                                   |                                                                                                                                                                                 |                                                                                                                                                                                                                                                                        |                                                                                                                                                                                |                                                                                                                                                                                                                                                                                                                                                                                                                                                          |                                                                                                                                                                                   |                                                                                                                                                                                                                                                                                                                                                                                                                                                           |                                                                                                                                                                               |                                                                                                                                                                                                                               |                                                                                                                                                                                  |                                                                                                                                                                                                                               |

Contact Author  
(populates the  
##PROLE\_AUTHOR\_..##  
e-mail tags):

Jacobs, Sara Rubin

Save

Current Contact Author: Jacobs, Sara  
Rubin  
([proxy](#))

Running Head: Factors Associated with Enrollment in Clinical Trials

Keywords: Cancer , Clinical trial enrollment , Community Clinical Oncology Program ,  
Organizational Design Features , Structural Equation Modeling , National  
Cancer Institute Oncology Research Program 

Supplement: NIHMS590040-supplement-01.pdf [file NIHMS590040-supplement-01.pdf]
